# Supplementary material for: Bis-isatin based polymers with tunable energy levels for organic field-effect transistor applications
Source: Royal Society of Chemistry journal article supplement (doi:10.1039/d0py01726d), 2021-01-01
Supplement: d0py01726d1.pdf [file d0py01726d1.pdf]

## Supporting Information

# Bis-isatin based polymers with tunable energy levels for organic field-effect transistor applications

Wei Yang,<sup>a</sup> Mingxiang Sun,<sup>b</sup> Yue Wang,<sup>c</sup> Hui Yan,<sup>c</sup> Guobing Zhang\*<sup>b</sup> and Qing Zhang\*<sup>a</sup>

<sup>a</sup>Shanghai Key Laboratory of Electrical Insulation and Thermal Aging, School of Chemistry and Chemical Engineering, Shanghai Jiaotong University, 800 Dongchuan Road, Shanghai, China; orcid.org/0000-0001-5934-8384; E-mail: qz14@sjtu.edu.cn (Q. Zhang).

<sup>b</sup>Special Display and Imaging Technology Innovation Center of Anhui Province, State Key Laboratory of Advanced Display Technology, Academy of Opto-Electronic Technology, Hefei University of Technology, Hefei, China; orcid.org/0000-0001-6053-2015; E-mail: gbzhang@hfut.edu.cn (G. Zhang)

<sup>c</sup>School of Pharmacy, Liaocheng University, Liaocheng, China; orcid.org/0000-0002-9843-0601.

|                                              |   |
|----------------------------------------------|---|
| 1. NMR and Mass Spectra of compounds.....    | 1 |
| 2. Crystallographic results .....            | 6 |
| 3. Thermal Analyses of Polymers .....        | 8 |
| 4. OFET device performances of polymers..... | 8 |

## 1. NMR and Mass Spectra of compounds

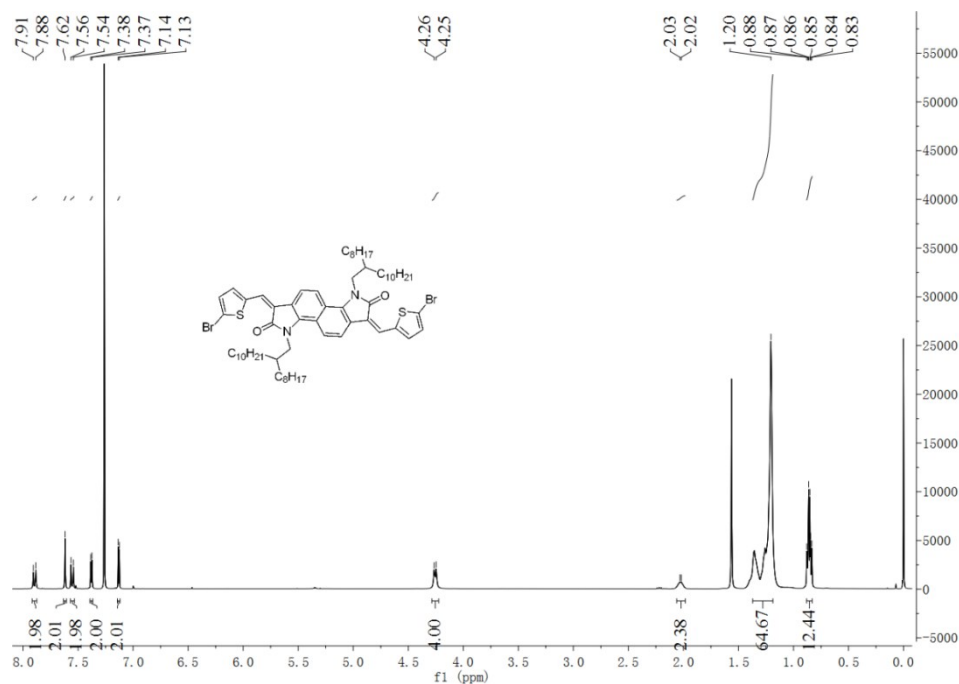

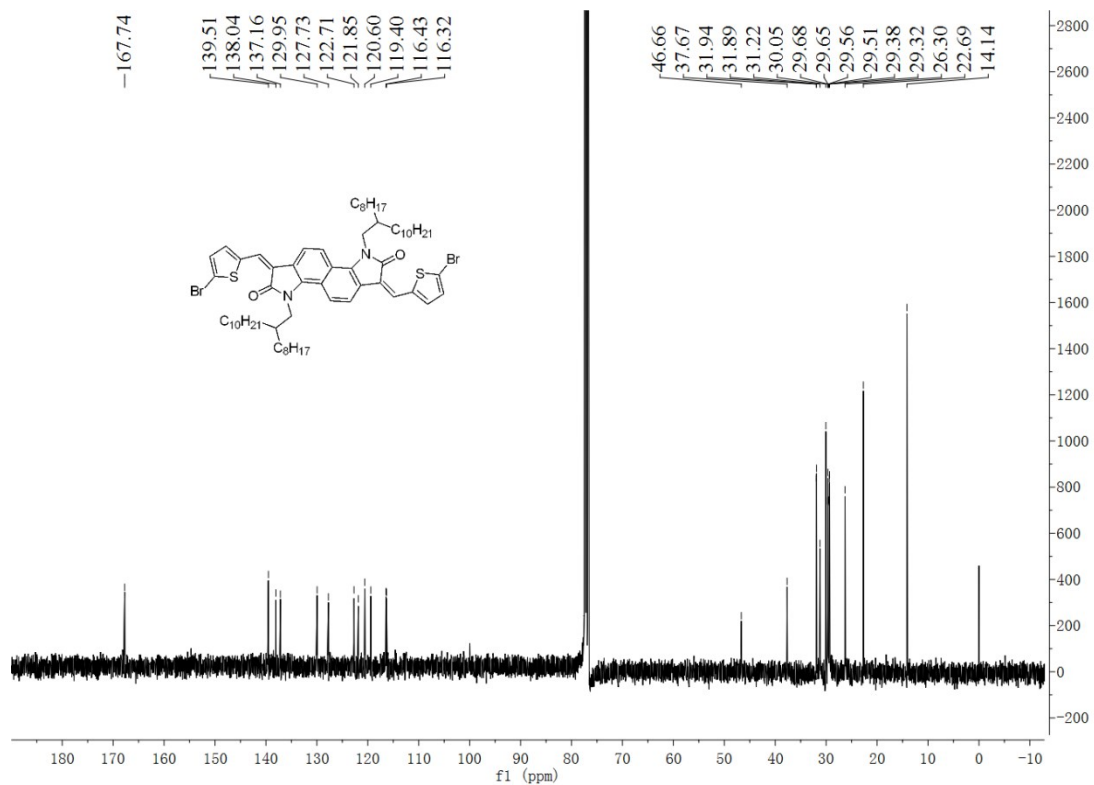

Figure S2.  $^{13}\text{C}$  NMR spectrum of **BTEI** in  $\text{CDCl}_3$

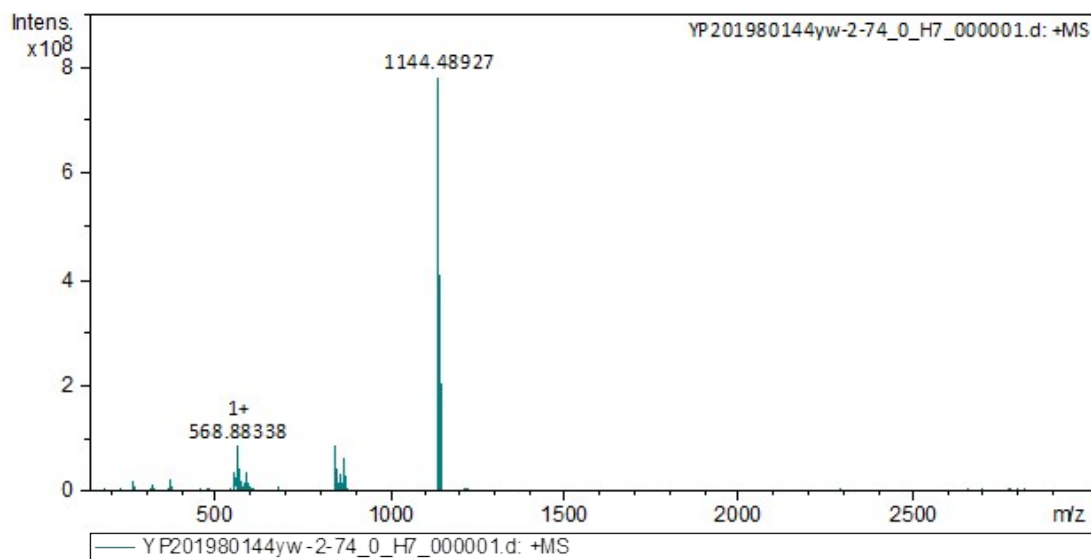

Figure S3. High-resolution MALDI-TOF spectrum of **BTEI**.

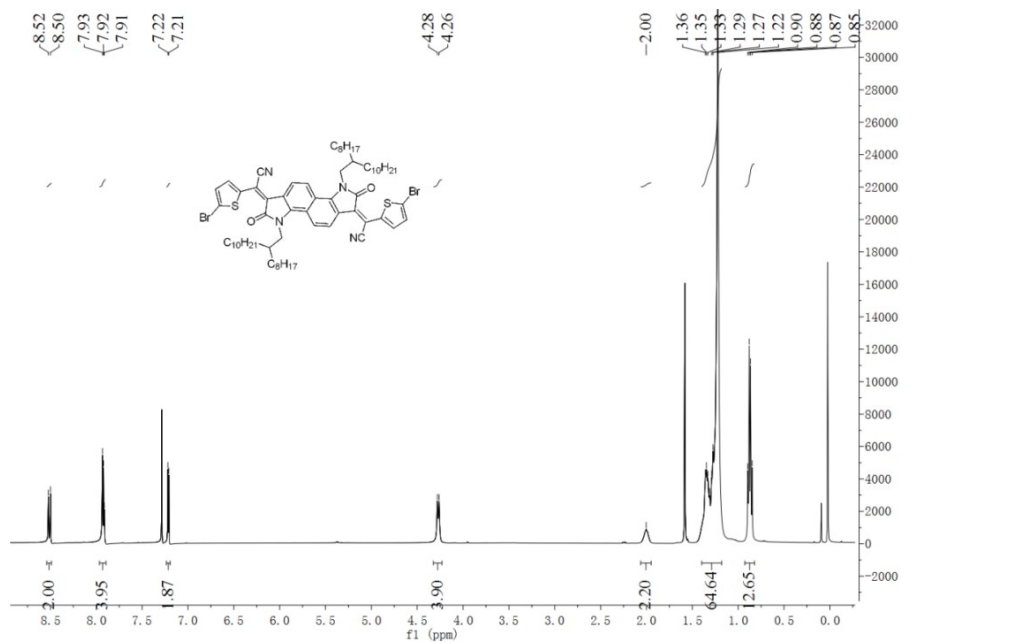

Figure S4. <sup>1</sup>H NMR spectrum of BTEI(CN) in CDCl<sub>3</sub>

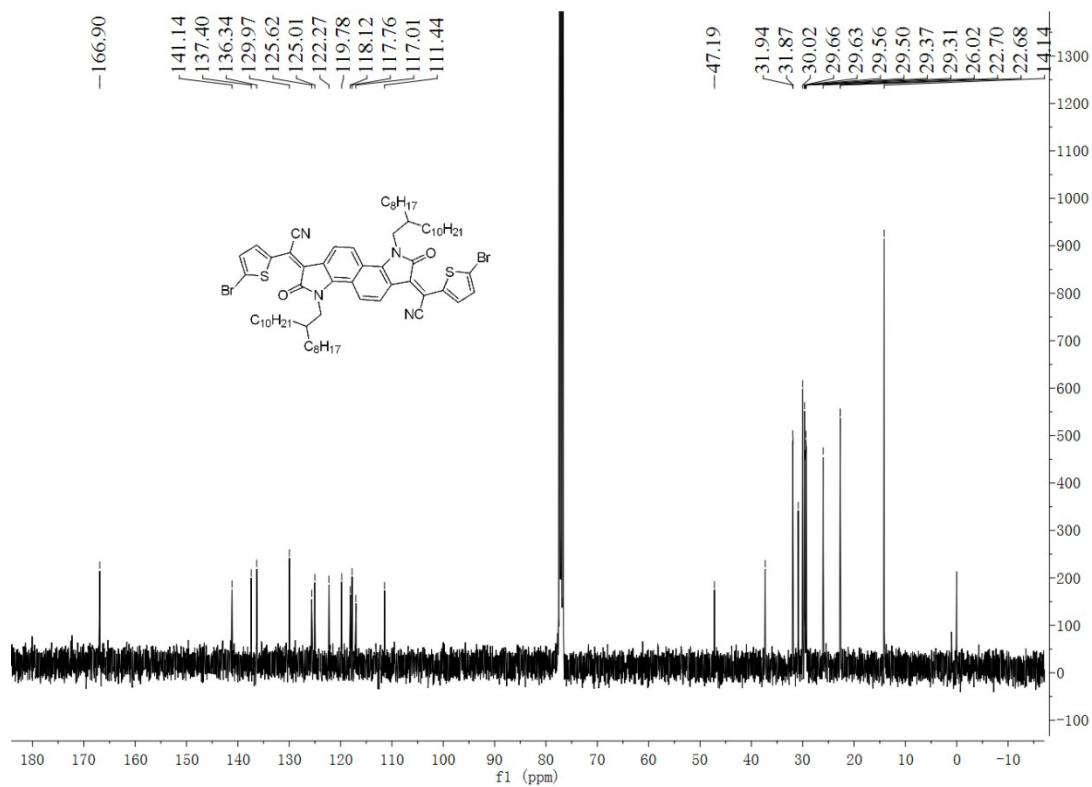

Figure S5. <sup>13</sup>C NMR spectrum of BTEI(CN) in CDCl<sub>3</sub>

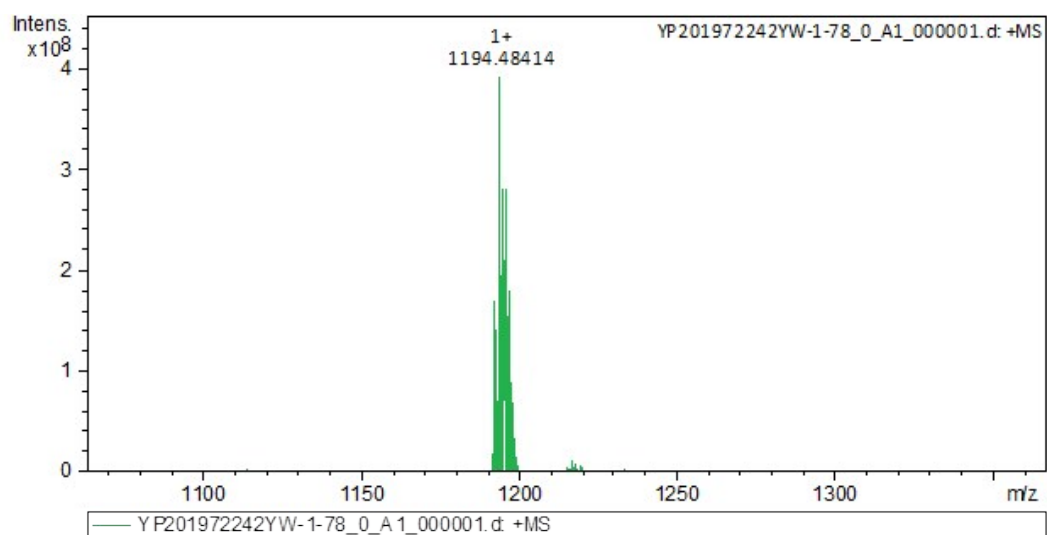

Figure S6. High-resolution MALDI-TOF spectra of **BTEI(CN)**.

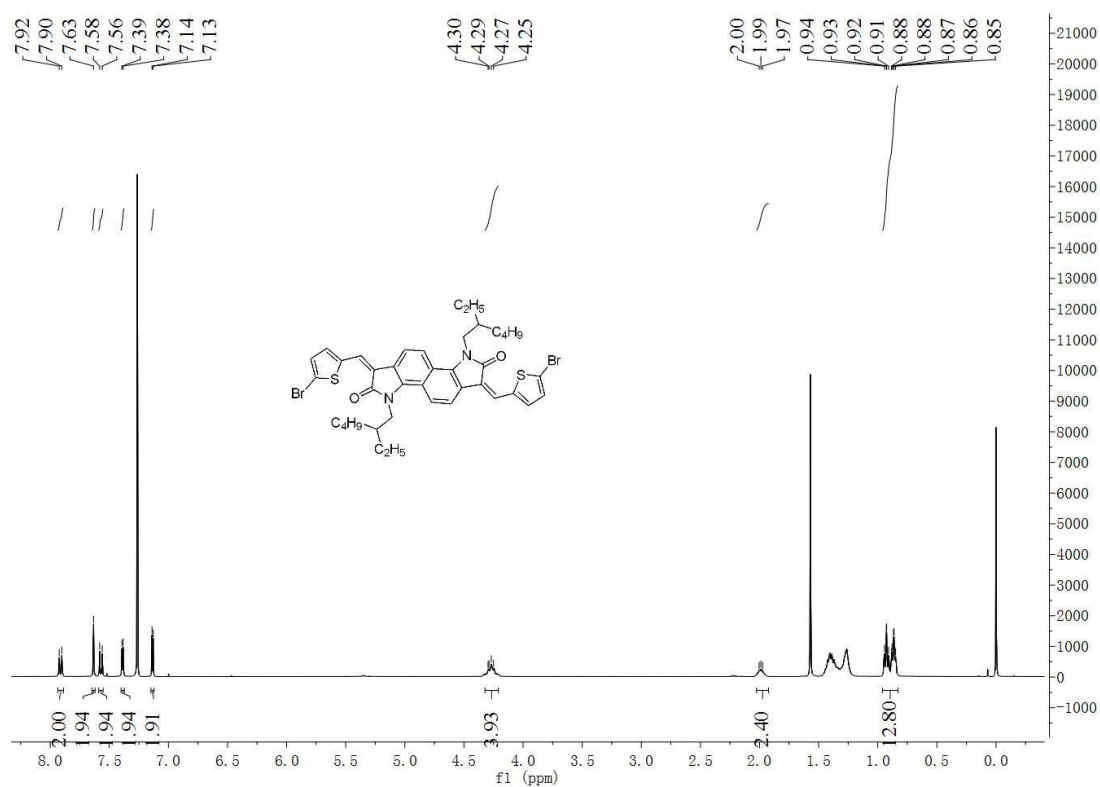

Figure S7.  $^1\text{H}$  NMR spectrum of **BTEI-C8** in  $\text{CDCl}_3$

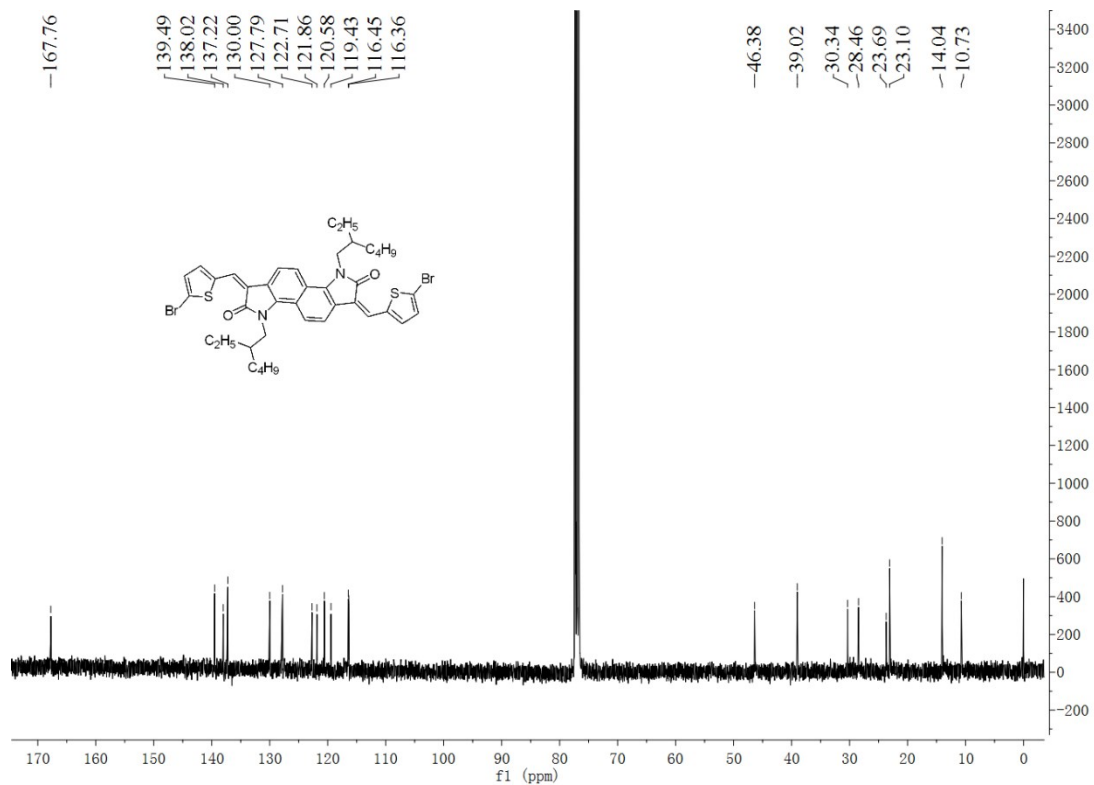

Figure S8. <sup>13</sup>C NMR spectrum of BTEI-C8 in CDCl<sub>3</sub>

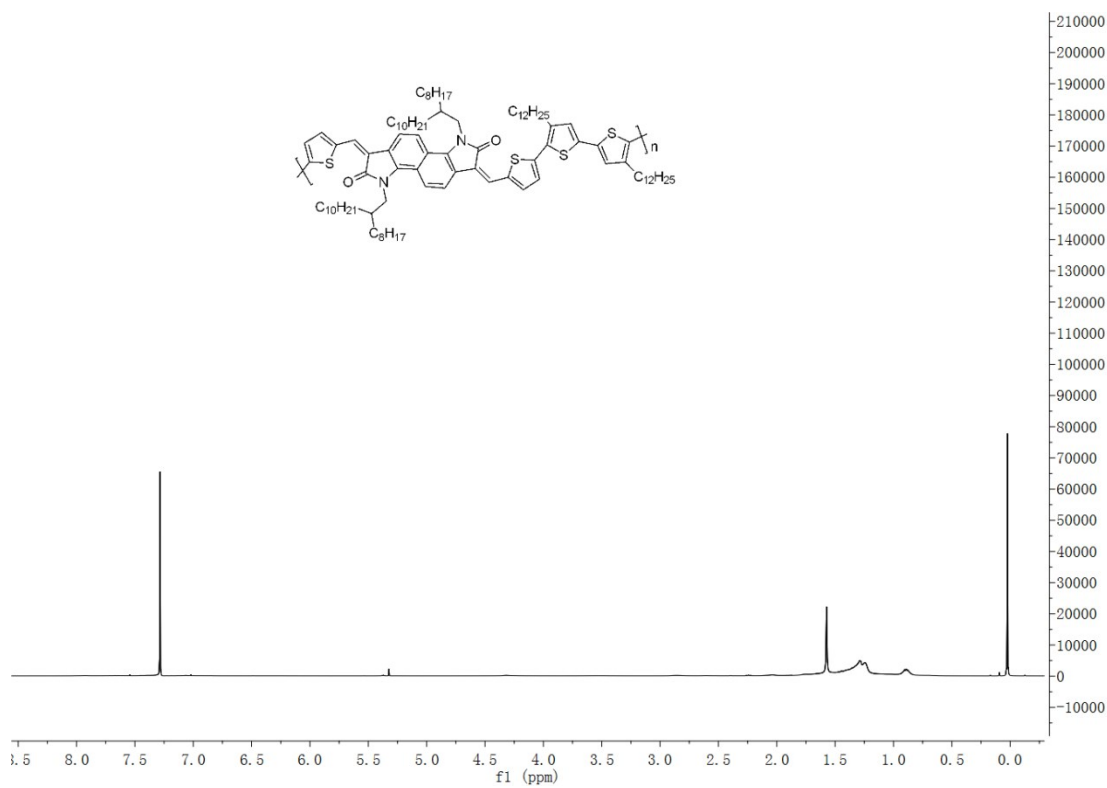

Figure S9. <sup>1</sup>H NMR spectrum of P1 in CDCl<sub>3</sub>

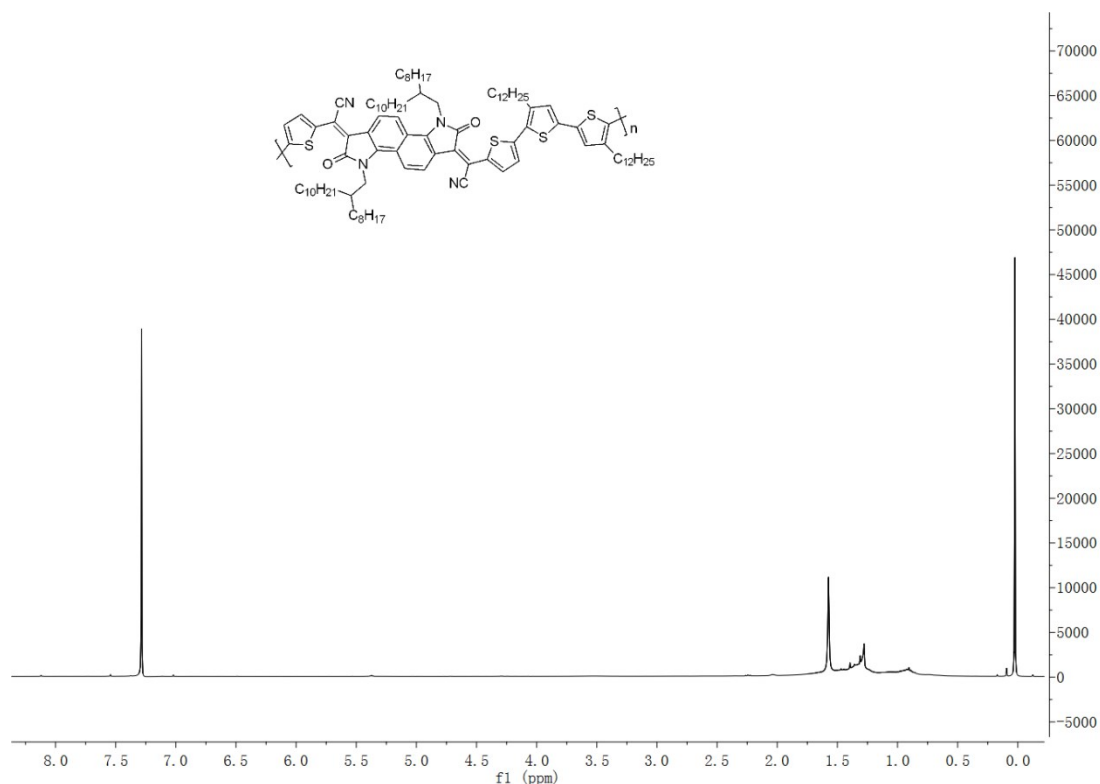

Figure S10.  $^1\text{H}$  NMR spectrum of **P2** in  $\text{CDCl}_3$

## 2. Crystallographic results

**Table S1.** Crystal data and structure refinement for **BTEI**.

|                             |                                                                            |
|-----------------------------|----------------------------------------------------------------------------|
| Empirical formula           | $\text{C}_{40} \text{H}_{34} \text{Br}_2 \text{N}_2 \text{O}_2 \text{S}_2$ |
| Formula weight              | 798.63                                                                     |
| Temperature                 | 173(2) K                                                                   |
| Wavelength                  | 1.54178 Å                                                                  |
| Crystal system, space group | Triclinic, P-1                                                             |
| Unit cell dimensions        | $a = 7.845(3)$ Å $\alpha = 73.92(3)$ deg                                   |
|                             | $b = 10.433(2)$ Å $\beta = 89.21(3)$ deg                                   |
|                             | $c = 15.690(7)$ Å $\gamma = 70.37(2)$ deg                                  |
| Volume                      | $1157.7(8)$ Å <sup>3</sup>                                                 |
| Z, Calculated density       | 1, 1.146 Mg/m <sup>3</sup>                                                 |
| Absorption coefficient      | $3.292 \text{ mm}^{-1}$                                                    |
| F(000)                      | 406                                                                        |
| Crystal size                | 0.200 x 0.180 x 0.150 mm                                                   |
| Theta range for data        | 4.701 to 68.342 deg                                                        |

|                                   |                                             |
|-----------------------------------|---------------------------------------------|
| collection                        |                                             |
| Limiting indices                  | -9<=h<=9, -12<=k<=12, -18<=l<=18            |
| Reflections collected / unique    | 15838 / 4228 [R(int) = 0.0342]              |
| Completeness to theta             | 67.679 99.6 %                               |
| Refinement method                 | Full-matrix least-squares on F <sup>2</sup> |
| Data / restraints / parameters    | 4228 / 1 / 218                              |
| Goodness-of-fit on F <sup>2</sup> | 1.434                                       |
| Final R indices [I>2sigma(I)]     | R1 = 0.0991, wR2 = 0.3312                   |
| R indices (all data)              | R1 = 0.1137, wR2 = 0.3571                   |
| Extinction coefficient            | n/a                                         |
| Largest diff. peak and hole       | 0.616 and -0.390 e.A <sup>-3</sup>          |

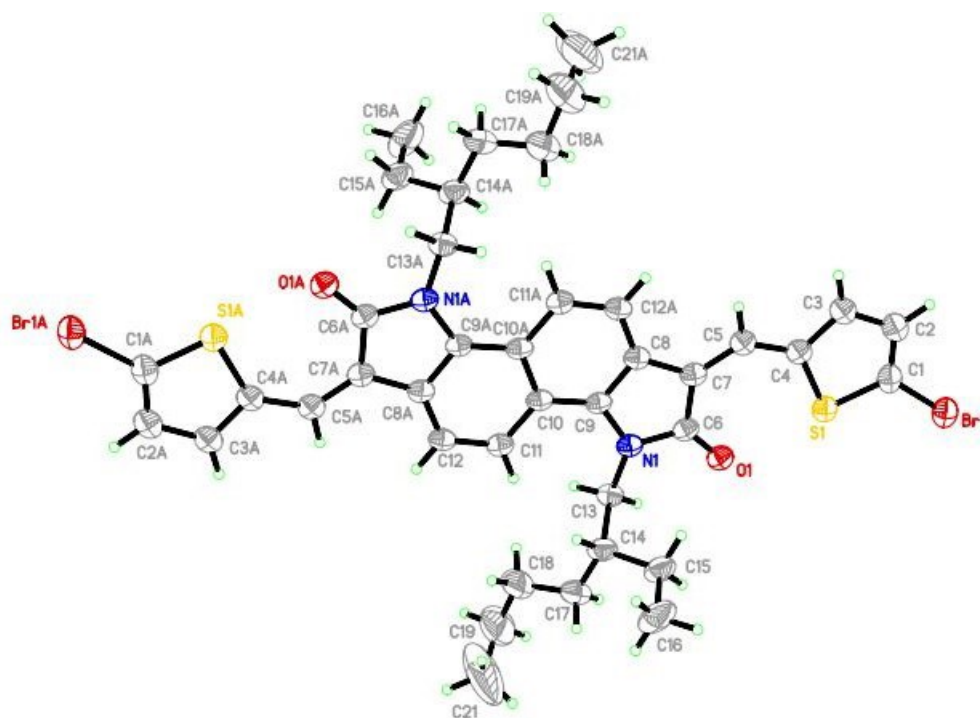

Figure S11. Single crystal structures of **BTEI**

**Table S2.** Selected Torsion angles (°) for Compound **BTEI**

| Bond type             | Torsion angles (°) |
|-----------------------|--------------------|
| S(1)-C(4)-C(5)-C(7)   | 0.2                |
| N(1)-C(9)-C(10)-C(11) | 0.9                |
| O(1)-C(6)-C(7)-C(5)   | -1.6               |

### 3. Thermal Analyses of Polymer

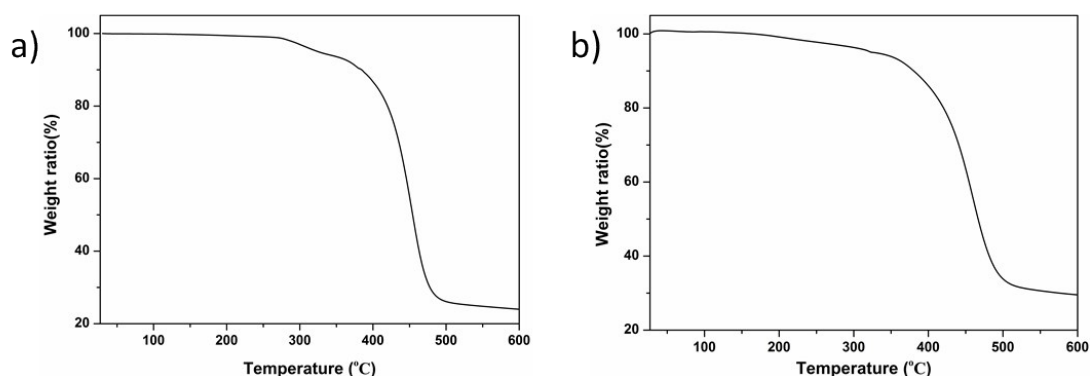

Figure S12. Thermogravimetric analysis (TGA) analysis of (a) **P1** and (b) **P2**

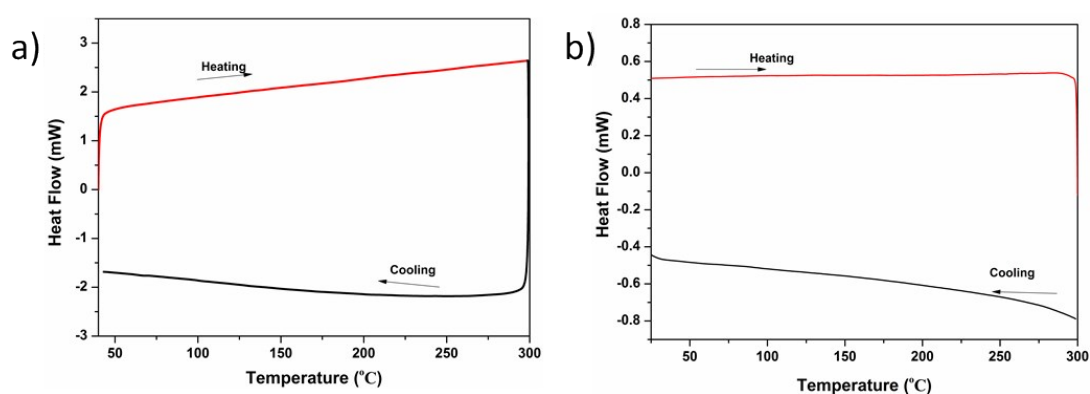

Figure S13. Differential scanning calorimetry (DSC) analysis of (a) **P1** and (b) **P2**

### 4. OFET device performance of polymers.

**Table S3.** OFET device performance of **P1** and **P2** polymers

| Compd | $T_{\text{annealing}}$<br>(°C) | $\mu_{\text{h,max}}(\mu_{\text{h,avg}})$<br>( $\text{cm}^2\text{V}^{-1}\text{s}^{-1}$ ) <sup>a</sup> | $V_{\text{th}}(\text{V})$ | $I_{\text{on}}/I_{\text{off}}$ | $\mu_{\text{e,max}}(\mu_{\text{e,avg}})$<br>( $\text{cm}^2\text{V}^{-1}\text{s}^{-1}$ ) <sup>b</sup> | $V_{\text{te}}(\text{V})$ | $I_{\text{on}}/I_{\text{off}}$ |
|-------|--------------------------------|------------------------------------------------------------------------------------------------------|---------------------------|--------------------------------|------------------------------------------------------------------------------------------------------|---------------------------|--------------------------------|
| P1    | N/A                            | 0.029(0.027)                                                                                         | -3.2                      | $10^4$                         |                                                                                                      |                           |                                |
|       | 180                            | 0.230(0.210)                                                                                         | -2.7                      | $10^6$                         |                                                                                                      |                           |                                |
|       | 210                            | 0.270(0.240)                                                                                         | -3.7                      | $10^6$                         |                                                                                                      |                           |                                |
| P2    | N/A                            | 0.051(0.047)                                                                                         | 10.1                      | $10^3$                         |                                                                                                      |                           |                                |
|       | 180                            | 0.068(0.064)                                                                                         | 9.3                       | $10^3$                         | 0.023(0.020)                                                                                         | 23.6                      | $10^6$                         |
|       | 210                            | 0.094(0.089)                                                                                         | 13.7                      | $10^3$                         | 0.024(0.020)                                                                                         | 31.1                      | $10^6$                         |

<sup>a</sup>Device fabricated in ambient conditions. <sup>b</sup>Devices fabricated in glovebox.
